# Supplementary material for: Delivery of Phenolic Compounds, Peptides and β-Glucan to the Gastrointestinal Tract by Incorporating Dietary Fibre-Rich Mushrooms into Sorghum Biscuits
Source: MDPI journal article supplement (doi:10.3390/foods10081812), 2021-08-05
Supplement: s1 [file s1]

Supplementary Materials:

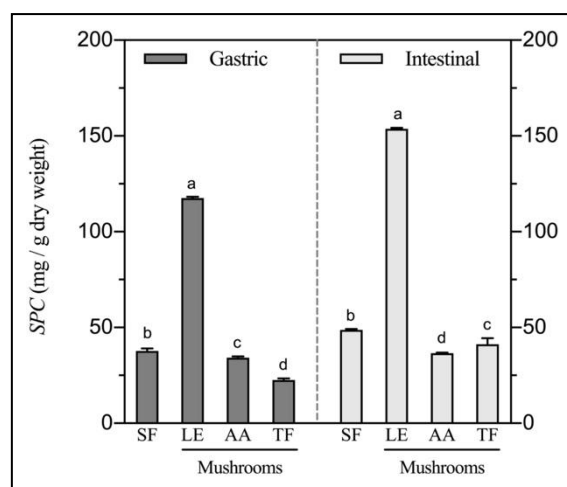

**Figure S1.** Soluble protein content (SPC) of mushrooms and sorghum flour after *in vitro* gastrointestinal digestion. Values are means  $\pm$  SD of triplicates. Means between different products with different letters are significantly different ( $p < 0.05$ ).

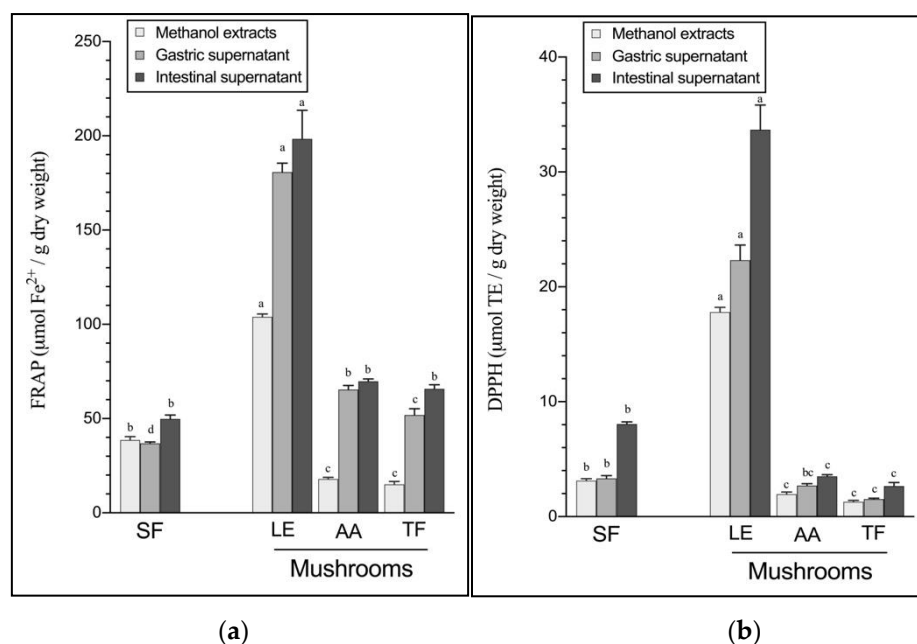

**Figure S2.** *In vitro* bioaccessible antioxidant activity of mushrooms and sorghum flour assessed by FRAP (a) and DPPH (b). Values are means  $\pm$  SD of triplicates. Means between different products with different letters are significantly different ( $p < 0.05$ ).

|                     | TDF    | SDF    | IDF    | G-SPC  | G-PC   | G-FRAP | G-DPPH | I-SPC  | I-PC   | I-FRAP | I-DPPH | Protein | Starch | $\beta$ -glucan | UR- $\beta$ -glucan | UR-TPC | UR-FRAP | UR-DPPH | FPC   | BPC   |
|---------------------|--------|--------|--------|--------|--------|--------|--------|--------|--------|--------|--------|---------|--------|-----------------|---------------------|--------|---------|---------|-------|-------|
| TDF                 |        | 0.000  | 0.000  | 0.032  | 0.014  | 0.696  | 0.203  | 0.627  | 0.012  | 0.001  | 0.127  | 0.634   | 0.000  | 0.000           | 0.000               | 0.053  | 0.539   | 0.018   | 0.175 | 0.114 |
| SDF                 | 0.830  |        | 0.000  | 0.382  | 0.880  | 0.038  | 0.156  | 0.916  | 0.092  | 0.222  | 0.675  | 0.032   | 0.001  | 0.001           | 0.147               | 0.558  | 0.193   | 0.957   | 0.000 | 0.776 |
| IDF                 | 0.990  | 0.743  |        | 0.018  | 0.003  | 0.328  | 0.055  | 0.542  | 0.010  | 0.000  | 0.049  | 0.272   | 0.000  | 0.000           | 0.000               | 0.011  | 0.286   | 0.003   | 0.419 | 0.046 |
| G-SPC               | 0.392  | 0.165  | 0.428  |        | 0.000  | 0.000  | 0.053  | 0.000  | 0.000  | 0.000  | 0.000  | 0.000   | 0.116  | 0.001           | 0.000               | 0.001  | 0.000   | 0.001   | 0.001 | 0.613 |
| G-PC                | 0.443  | 0.029  | 0.524  | 0.601  |        | 0.000  | 0.000  | 0.016  | 0.172  | 0.000  | 0.019  | 0.000   | 0.006  | 0.000           | 0.000               | 0.000  | 0.002   | 0.000   | 0.003 | 0.011 |
| G-FRAP              | 0.074  | -0.380 | 0.185  | 0.685  | 0.704  |        | 0.000  | 0.000  | 0.012  | 0.000  | 0.000  | 0.000   | 0.262  | 0.018           | 0.000               | 0.000  | 0.000   | 0.000   | 0.000 | 0.215 |
| G-DPPH              | 0.239  | -0.266 | 0.354  | 0.357  | 0.660  | 0.774  |        | 0.382  | 0.165  | 0.000  | 0.000  | 0.000   | 0.003  | 0.060           | 0.000               | 0.000  | 0.000   | 0.000   | 0.001 | 0.002 |
| I-SPC               | 0.092  | -0.020 | 0.116  | 0.822  | 0.435  | 0.601  | 0.165  |        | 0.001  | 0.001  | 0.006  | 0.001   | 0.763  | 0.051           | 0.040               | 0.036  | 0.001   | 0.074   | 0.000 | 0.186 |
| I-PC                | 0.452  | 0.313  | 0.463  | 0.639  | 0.256  | 0.455  | 0.260  | 0.594  |        | 0.000  | 0.000  | 0.010   | 0.128  | 0.002           | 0.006               | 0.002  | 0.001   | 0.136   | 0.087 | 0.665 |
| I-FRAP              | 0.577  | 0.230  | 0.634  | 0.763  | 0.736  | 0.749  | 0.665  | 0.555  | 0.995  |        | 0.000  | 0.000   | 0.002  | 0.000           | 0.000               | 0.000  | 0.000   | 0.000   | 0.005 | 0.227 |
| I-DPPH              | 0.285  | -0.080 | 0.362  | 0.601  | 0.427  | 0.699  | 0.631  | 0.489  | 0.725  | 0.673  |        | 0.000   | 0.051  | 0.028           | 0.001               | 0.000  | 0.000   | 0.001   | 0.001 | 0.348 |
| Protein             | 0.091  | -0.392 | 0.207  | 0.642  | 0.662  | 0.963  | 0.814  | 0.557  | 0.464  | 0.710  | 0.755  |         | 0.169  | 0.020           | 0.000               | 0.000  | 0.000   | 0.000   | 0.000 | 0.221 |
| Starch              | -0.891 | -0.575 | -0.923 | -0.293 | -0.494 | -0.212 | -0.521 | 0.058  | -0.284 | -0.550 | -0.359 | -0.258  |        | 0.000           | 0.000               | 0.006  | 0.275   | 0.002   | 0.426 | 0.012 |
| $\beta$ -glucan     | 0.834  | 0.555  | 0.860  | 0.596  | 0.620  | 0.427  | 0.347  | 0.359  | 0.539  | 0.713  | 0.401  | 0.423   | -0.730 |                 | 0.000               | 0.007  | 0.101   | 0.006   | 0.362 | 0.164 |
| UR- $\beta$ -glucan | 0.714  | 0.271  | 0.788  | 0.635  | 0.762  | 0.678  | 0.726  | 0.376  | 0.491  | 0.828  | 0.595  | 0.713   | -0.797 | 0.834           |                     | 0.000  | 0.001   | 0.000   | 0.024 | 0.036 |
| UR-TPC              | 0.357  | -0.111 | 0.456  | 0.595  | 0.660  | 0.783  | 0.826  | 0.385  | 0.536  | 0.788  | 0.824  | 0.851   | -0.493 | 0.485           | 0.754               |        | 0.000   | 0.000   | 0.001 | 0.040 |
| UR-FRAP             | 0.117  | -0.245 | 0.201  | 0.664  | 0.545  | 0.798  | 0.690  | 0.568  | 0.578  | 0.720  | 0.795  | 0.857   | -0.206 | 0.305           | 0.588               | 0.908  |         | 0.000   | 0.589 |       |
| UR-DPPH             | 0.431  | -0.010 | 0.519  | 0.562  | 0.782  | 0.645  | 0.699  | 0.331  | 0.279  | 0.656  | 0.583  | 0.676   | -0.544 | 0.489           | 0.706               | 0.814  | 0.722   |         | 0.015 | 0.003 |
| FPC                 | -0.254 | -0.603 | -0.153 | 0.571  | 0.524  | 0.911  | 0.557  | 0.613  | 0.318  | 0.498  | 0.556  | 0.872   | 0.151  | 0.173           | 0.410               | 0.567  | 0.696   | 0.442   |       | 0.690 |
| BPC                 | 0.295  | -0.054 | 0.367  | -0.096 | 0.460  | 0.233  | 0.552  | -0.248 | -0.082 | 0.227  | 0.177  | 0.230   | -0.455 | 0.261           | 0.385               | 0.376  | 0.103   | 0.517   | 0.076 |       |

**Figure S3.** Pearson's correlations between the observed biscuits parameters before and after digestion. The right side of the green part is  $p$  values, whilst the left side of the yellow part is  $r$  values. CB- control biscuit; LEB- *Lentinula edodes* biscuit; AAB- *Auricularia auricula* biscuit; TFB- *Tremella fuciformis* biscuit; FPC- free phenolic content of biscuits; BPC- bound phenolic content of biscuits; G-PC, G-FRAP, and G-DPPH represent the phenolic content and antioxidant activity of gastric supernatant; I-PC, I-FRAP, and I-DPPH represented the phenolic content and antioxidant activity of intestinal supernatant; G-SPC- soluble protein content in gastric supernatant; I-SPC- soluble protein content in intestinal supernatant; TDF- total dietary fibre of biscuits; SDF- soluble dietary fibre of biscuits; IDF- insoluble dietary fibre; UR-TPC, UR-FRAP, and UR-DPPH represented the total phenolic content and antioxidant activity of undigested residue; UR- $\beta$ -glucan-  $\beta$ -glucan content of undigested residue.

**Table S1.** Formula of sorghum biscuits enriched with dried mushroom powders.

| Biscuits | Sorghum flour (g) | Mushroom powder (g) | Sugar (g) | Vegetable shortening (g) | Salt (g) | Sodium bicarbonate (g) | Water (g) |
|----------|-------------------|---------------------|-----------|--------------------------|----------|------------------------|-----------|
| CB       | 225               | -                   | 65        | 64                       | 2.1      | 2.5                    | 50        |
| 5% LEB   | 213.75            | 11.25               | 65        | 64                       | 2.1      | 2.5                    | 50        |
| 10% LEB  | 202.5             | 22.5                | 65        | 64                       | 2.1      | 2.5                    | 50        |
| 15% LEB  | 191.25            | 33.75               | 65        | 64                       | 2.1      | 2.5                    | 50        |
| 5% AAB   | 213.75            | 11.25               | 65        | 64                       | 2.1      | 2.5                    | 50        |
| 10% AAB  | 202.5             | 22.5                | 65        | 64                       | 2.1      | 2.5                    | 50        |
| 15% AAB  | 191.25            | 33.75               | 65        | 64                       | 2.1      | 2.5                    | 50        |
| 5% TFB   | 213.75            | 11.25               | 65        | 64                       | 2.1      | 2.5                    | 50        |
| 10% TFB  | 202.5             | 22.5                | 65        | 64                       | 2.1      | 2.5                    | 50        |
| 15% TFB  | 191.25            | 33.75               | 65        | 64                       | 2.1      | 2.5                    | 50        |

**Table S2.** Starch, protein and dietary fibre contents and *in vitro* glycaemic response of sorghum biscuits enriched with dried mushroom powders.

| Biscuits | Starch<br>(g/100g dw)      | Protein<br>(g/100g dw)    | TDF<br>(g/100g dw)         | IDF<br>(g/100g dw)         | SDF<br>(g/100g dw)        | Glycaemic<br>glucose (g/100g<br>dw) |
|----------|----------------------------|---------------------------|----------------------------|----------------------------|---------------------------|-------------------------------------|
| CB       | 43.39 ± 0.45 <sup>a</sup>  | 7.21 ± 0.02 <sup>e</sup>  | 8.23 ± 0.03 <sup>f</sup>   | 6.70 ± 0.05 <sup>f</sup>   | 1.53 ± 0.02 <sup>f</sup>  | 39.94 ± 1.02 <sup>a</sup>           |
| 5% LEB   | 42.08 ± 0.24 <sup>bc</sup> | 7.76 ± 0.02 <sup>c</sup>  | 10.75 ± 0.02 <sup>e</sup>  | 9.06 ± 0.05 <sup>e</sup>   | 1.68 ± 0.04 <sup>f</sup>  | 33.96 ± 0.92 <sup>b</sup>           |
| 10% LEB  | 40.77 ± 0.21 <sup>de</sup> | 8.25 ± 0.11 <sup>b</sup>  | 12.63 ± 0.32 <sup>d</sup>  | 10.87 ± 0.29 <sup>d</sup>  | 1.76 ± 0.03 <sup>f</sup>  | 33.12 ± 0.22 <sup>b</sup>           |
| 15% LEB  | 39.55 ± 0.31 <sup>f</sup>  | 8.84 ± 0.05 <sup>a</sup>  | 14.54 ± 0.51 <sup>c</sup>  | 12.75 ± 0.49 <sup>bc</sup> | 1.79 ± 0.02 <sup>f</sup>  | 32.27 ± 0.59 <sup>b</sup>           |
| 5% AAB   | 41.81 ± 0.30 <sup>cd</sup> | 7.28 ± 0.02 <sup>de</sup> | 11.42 ± 0.20 <sup>e</sup>  | 9.59 ± 0.30 <sup>e</sup>   | 1.84 ± 0.10 <sup>ef</sup> | 32.82 ± 0.97 <sup>b</sup>           |
| 10% AAB  | 38.91 ± 0.26 <sup>fg</sup> | 7.29 ± 0.05 <sup>de</sup> | 15.31 ± 0.12 <sup>bc</sup> | 12.90 ± 0.01 <sup>b</sup>  | 2.42 ± 0.11 <sup>cd</sup> | 31.68 ± 1.56 <sup>b</sup>           |
| 15% AAB  | 37.98 ± 0.43 <sup>g</sup>  | 7.38 ± 0.07 <sup>d</sup>  | 17.36 ± 0.34 <sup>a</sup>  | 14.37 ± 0.32 <sup>a</sup>  | 2.98 ± 0.03 <sup>ab</sup> | 27.35 ± 1.93 <sup>c</sup>           |
| 5% TFB   | 42.99 ± 0.49 <sup>ab</sup> | 7.20 ± 0.01 <sup>e</sup>  | 11.60 ± 0.21 <sup>de</sup> | 9.44 ± 0.25 <sup>e</sup>   | 2.17 ± 0.04 <sup>de</sup> | 32.08 ± 1.19 <sup>b</sup>           |
| 10% TFB  | 41.36 ± 0.47 <sup>cd</sup> | 7.31 ± 0.03 <sup>de</sup> | 14.48 ± 0.35 <sup>c</sup>  | 11.81 ± 0.19 <sup>cd</sup> | 2.66 ± 0.16 <sup>bc</sup> | 30.80 ± 0.94 <sup>b</sup>           |
| 15% TFB  | 39.94 ± 0.36 <sup>ef</sup> | 7.33 ± 0.05 <sup>de</sup> | 16.37 ± 0.16 <sup>ab</sup> | 13.13 ± 0.01 <sup>b</sup>  | 3.24 ± 0.17 <sup>a</sup>  | 26.63 ± 8.03 <sup>c</sup>           |

Values in the same column with different letters are significantly different ( $p < 0.05$ ). Values are means ± standard deviation ( $n=3$ ). This table of supplementary data are shown in our submitted paper "Utilisation of dried shiitake (*Lentinula edodes*), black ear (*Auricularia auricula*), and silver ear (*Tremella fuciformis*) mushrooms into sorghum biscuits manipulates the predictive *in vitro* glucose values in relation to variations in biscuit physical characteristics". The method for the evaluation of the glycaemic glucose was according to the description of Wu, *et al.* [1].

1. Wu, G.; Hui, X.; Stipkovits, L.; Rachman, A.; Tu, J.; Brennan, M.A.; Brennan, C.S. Whey protein-blackcurrant concentrate particles obtained by spray-drying and freeze-drying for delivering structural and health benefits of cookies. *Innovative Food Science & Emerging Technologies* **2021**, *68*, doi:10.1016/j.ifset.2021.102606.
